# Supplementary material for: Two-dimensional hopping motion of encapsulated La atoms in silylated La2@C80
Source: Royal Society of Chemistry journal article supplement (doi:10.1039/b703473c), 2007-01-01
Supplement: b703473c.pdf [file b703473c.pdf]

## Supplementary Information

### Two-Dimensional Hopping Motion of Encapsulated La Atoms in Silylated La<sub>2</sub>@C<sub>80</sub>

Takatsugu Wakahara,<sup>a</sup> Michio Yamada,<sup>a</sup> Satomi Takahashi,<sup>b</sup> Tsukasa Nakahodo,<sup>a</sup>  
Takahiro Tsuchiya,<sup>a</sup> Yutaka Maeda,<sup>c</sup> Takeshi Akasaka,<sup>\*,a</sup> Masahiro Kako,<sup>d</sup> Kenji Yoza,<sup>\*,e</sup>

Ernst Horn,<sup>f</sup> Naomi Mizorogi,<sup>g</sup> and Shigeru Nagase<sup>\*,g</sup>

<sup>a</sup>Center for Tsukuba Advanced Research Alliance, University of Tsukuba, Tsukuba, Ibaraki 305-8577, Japan,

<sup>b</sup>Graduate School of Science and Technology, Niigata University, Niigata 950-2181, Japan, <sup>c</sup>Department of

Chemistry, Tokyo Gakugei University, Koganei, Tokyo 184-5801, Japan, <sup>d</sup>Department of Applied Physics and

Chemistry, The University of Electro-Communications, Chofu, Tokyo 182-8585, Japan, <sup>e</sup>Bruker AXS K. K., Yokohama,

Kanagawa 221-0022, Japan, <sup>f</sup>Department of Chemistry, Rikkyo University, Tokyo 171-8501, Japan, <sup>g</sup>Department of

Theoretical Molecular Science, Institute for Molecular Science, Myodaiji, Okazaki 444-8585, Japan

#### Table of Contents:

|                                                                                                                  |     |
|------------------------------------------------------------------------------------------------------------------|-----|
| <b>Figure S1.</b> HPLC profiles of isolated <b>3a</b> and <b>3b</b> .                                            | S2  |
| <b>Figure S2.</b> MALDI-TOF mass spectra of isolated <b>3a</b> and <b>3b</b> .                                   | S3  |
| <b>Figure S3.</b> Vis-near-IR spectra of isolated <b>3a</b> , <b>3b</b> , and La <sub>2</sub> @C <sub>80</sub> . | S4  |
| <b>Figure S4.</b> Cyclic and differential pulse voltammograms of <b>3a</b> .                                     | S5  |
| <b>Figure S5.</b> Cyclic and differential pulse voltammograms of <b>3b</b> .                                     | S6  |
| <b>Figure S6.</b> <sup>1</sup> H NMR spectrum of <b>3a</b> .                                                     | S7  |
| <b>Figure S7.</b> <sup>13</sup> C NMR spectrum of <b>3a</b> .                                                    | S8  |
| <b>Figure S8.</b> <sup>1</sup> H NMR spectrum of <b>3b</b> .                                                     | S9  |
| <b>Figure S9.</b> <sup>13</sup> C NMR spectrum of <b>3b</b> .                                                    | S10 |
| <b>Figure S10.</b> <sup>13</sup> C NMR spectrum of La <sub>2</sub> @C <sub>80</sub> .                            | S11 |
| <b>Table S1.</b> Redox potentials of <b>3a</b> , <b>3b</b> , and La <sub>2</sub> @C <sub>80</sub> .              | S12 |

(a)

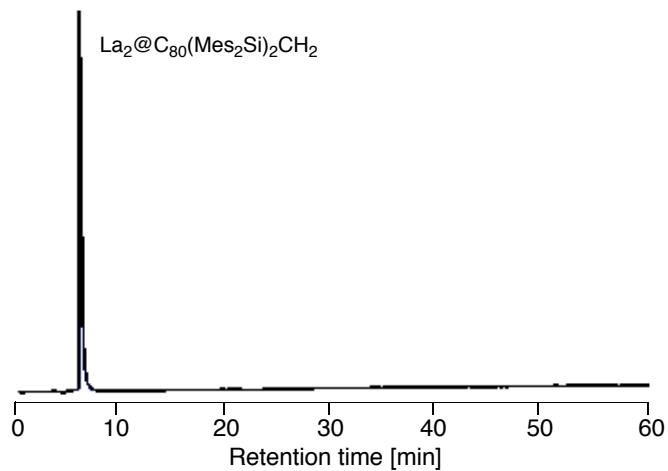

(b)

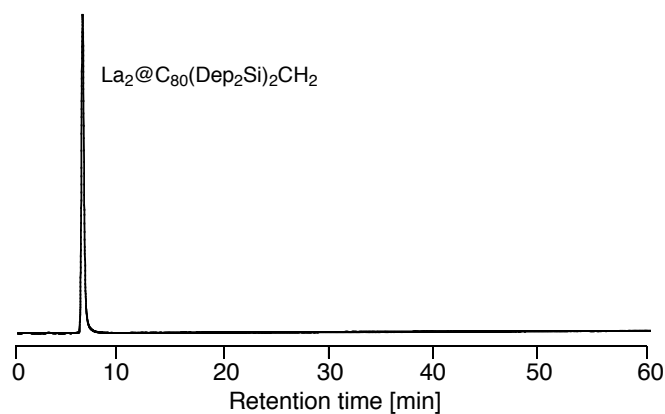

**Figure S1.** HPLC profiles of isolated (a) **3a** and (b) **3b**; column, Buckyprep  $\phi 4.6 \text{ mm} \times 250 \text{ mm}$ ; eluent, toluene 1.0 mL/min. 330 nm UV detection was used.

(a)

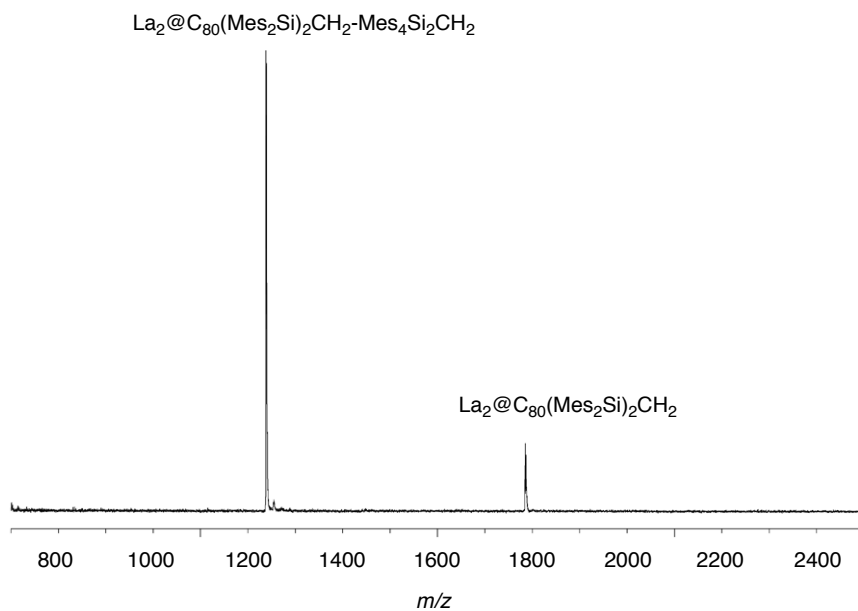

(b)

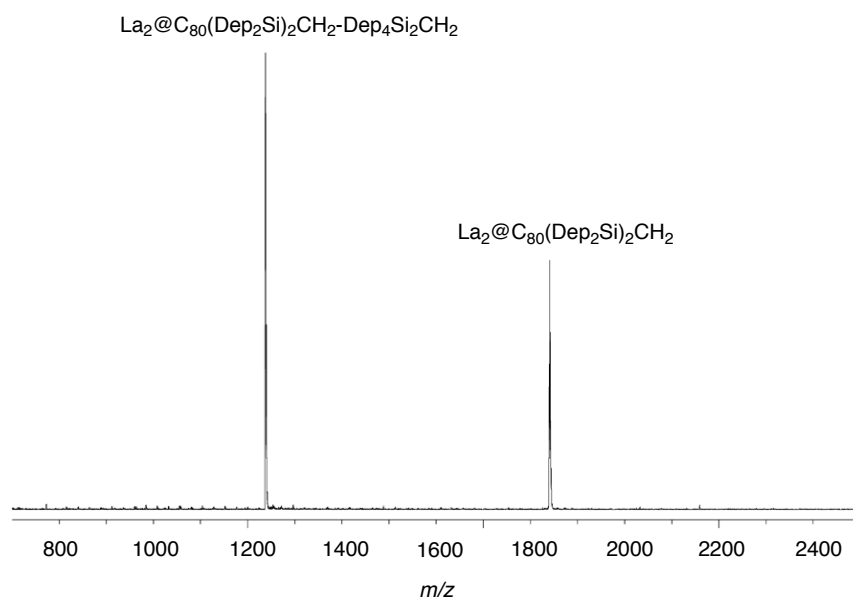

**Figure S2.** MALDI-TOF Mass spectra of isolated (a) **3a** and (b) **3b**. The spectra were recorded in negative mode with 9-nitroanthracene as matrix.

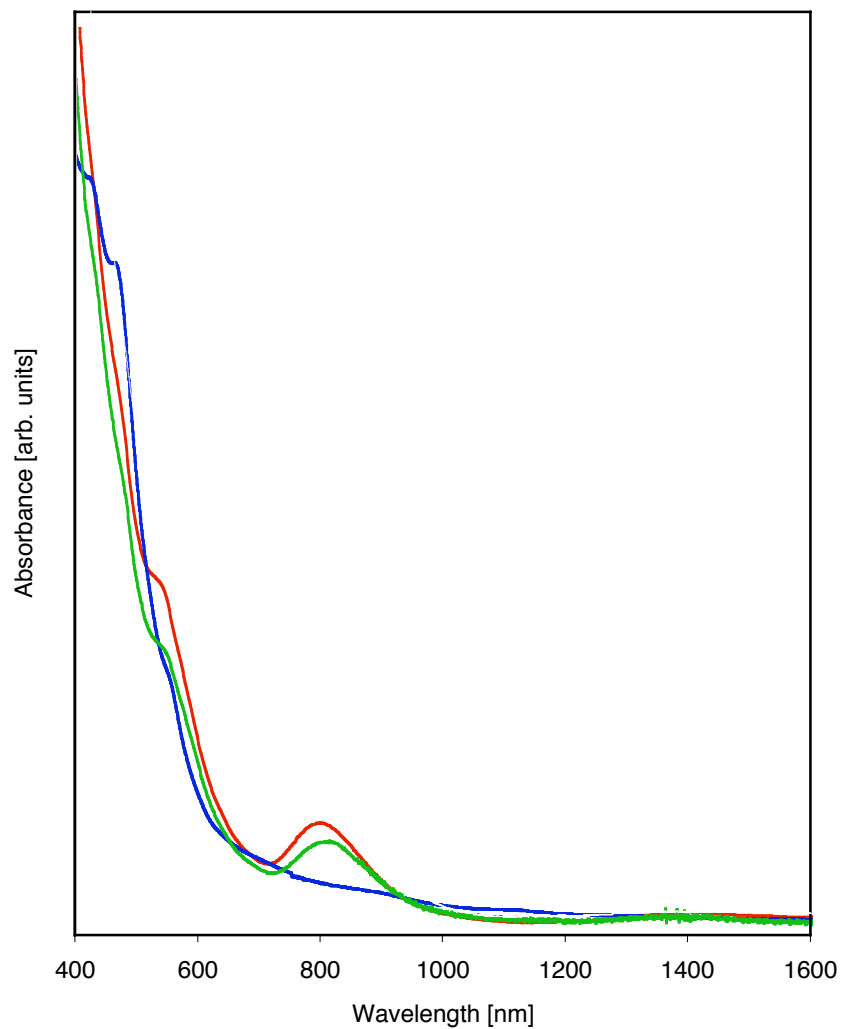

**Figure S3.** Vis-near-IR spectra of isolated **3a** (green line), **3b** (red line), and La<sub>2</sub>@C<sub>80</sub> (blue line).

(a)

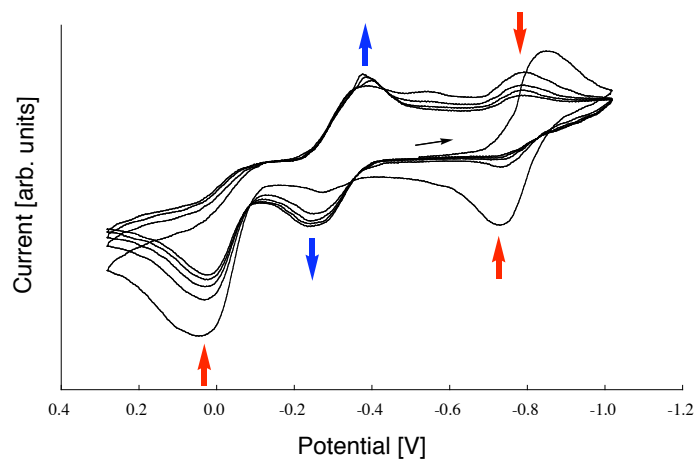

(b)

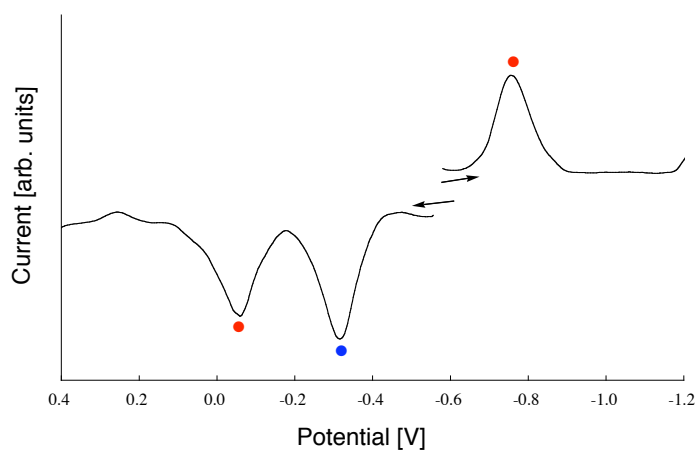

**Figure S4.** (a) Cyclic and (b) differential pulse voltammograms of **3a**. The peaks of **3a** and the peaks of  $\text{La}_2@\text{C}_{80}$  formed by retro-cycloaddition are marked as red and blue arrows (circles), respectively.

(a)

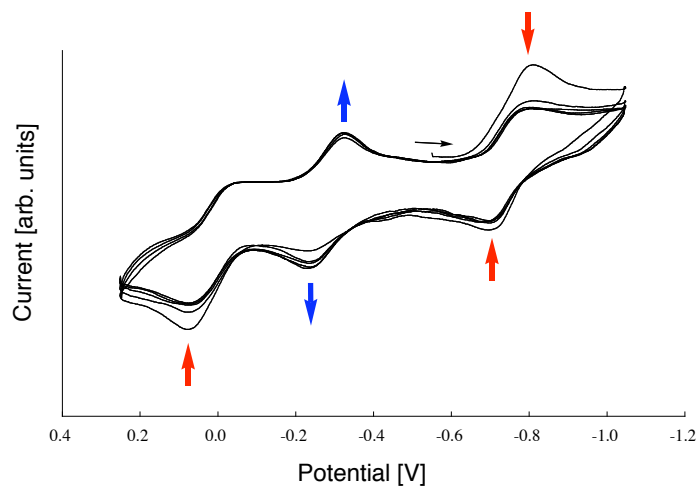

(b)

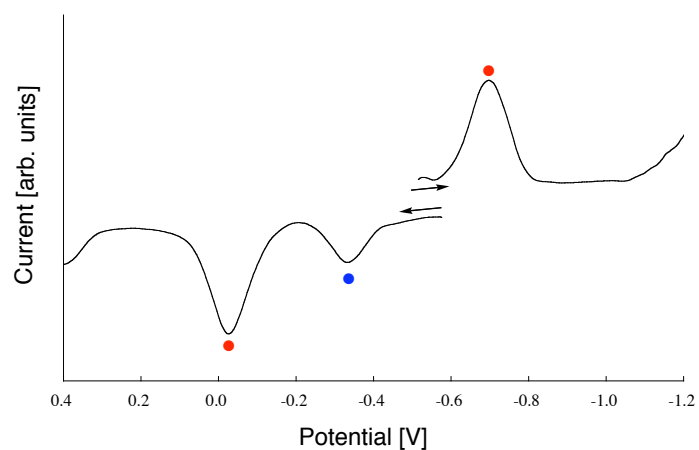

**Figure S5.** (a) Cyclic and (b) differential pulse voltammograms of **3b**. The peaks of **3b** and the peaks of  $\text{La}_2@\text{C}_{80}$  formed by retro-cycloaddition are marked as red and blue arrows (circles), respectively.

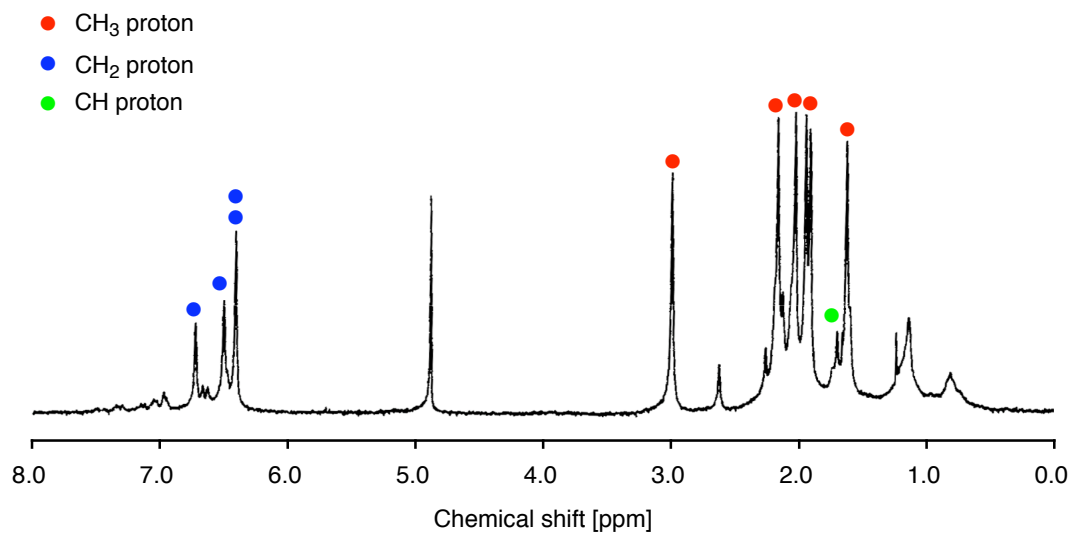

**Figure S6.** <sup>1</sup>H NMR spectrum (300 MHz) of **3a** in CS<sub>2</sub>/CD<sub>2</sub>Cl<sub>2</sub> (3/1) at 213 K.

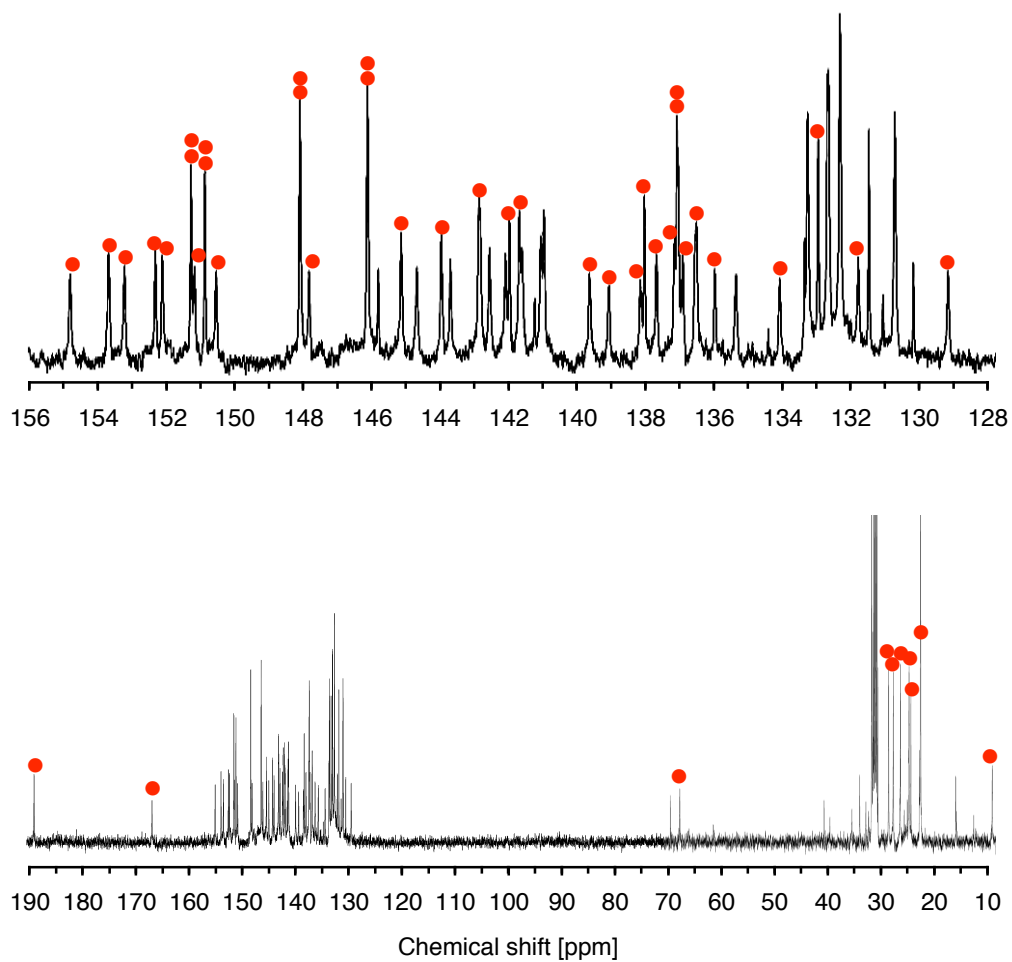

**Figure S7.**  $^{13}\text{C}$  NMR spectrum (125 MHz) of **3a** in  $\text{CS}_2/\text{CD}_2\text{Cl}_2$  (3/1) at 213 K.



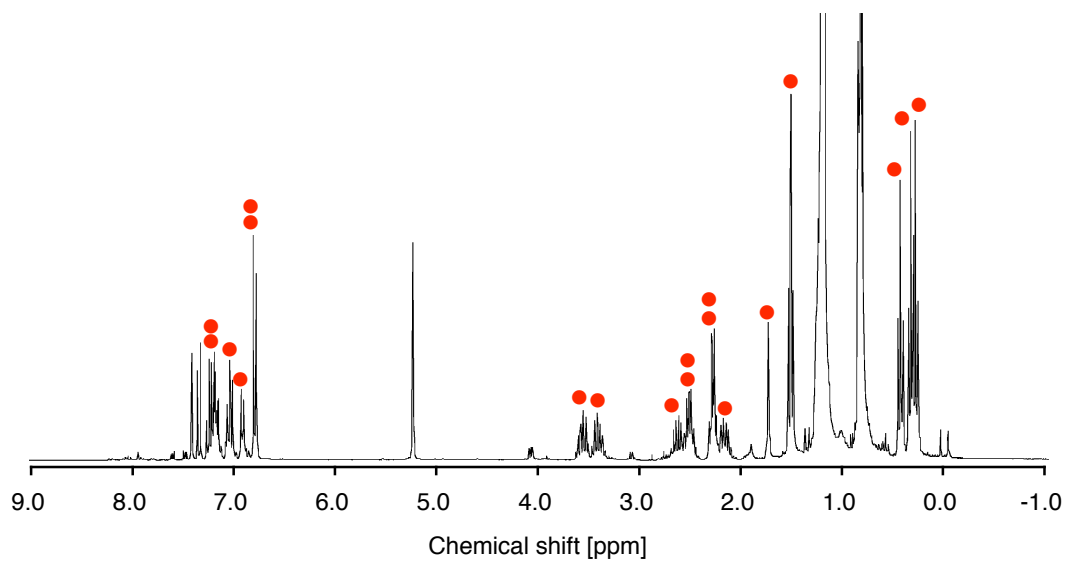

**Figure S8.** <sup>1</sup>H NMR spectrum (500 MHz) of **3b** in CS<sub>2</sub>/CD<sub>2</sub>Cl<sub>2</sub> (3/1) at 288 K.

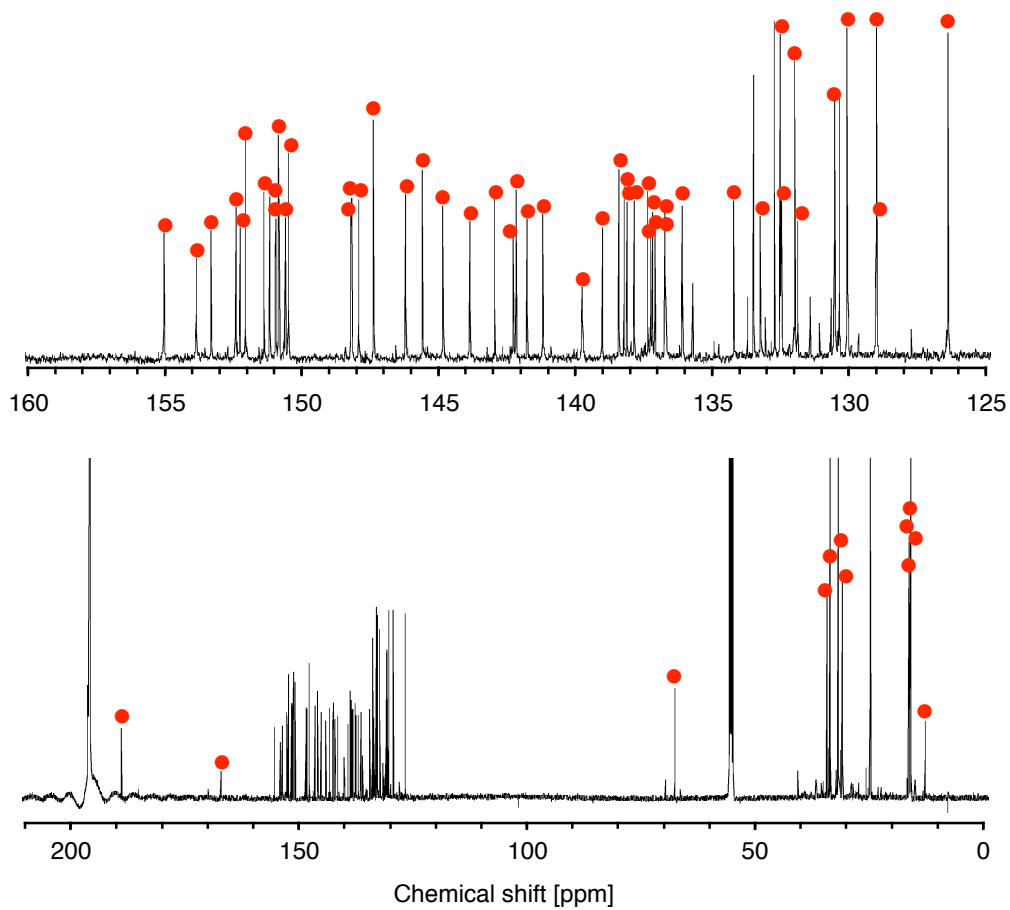

**Figure S9.** <sup>13</sup>C NMR spectrum (500 MHz) of **3b** in CS<sub>2</sub>/CD<sub>2</sub>Cl<sub>2</sub> (3/1) at 288 K.

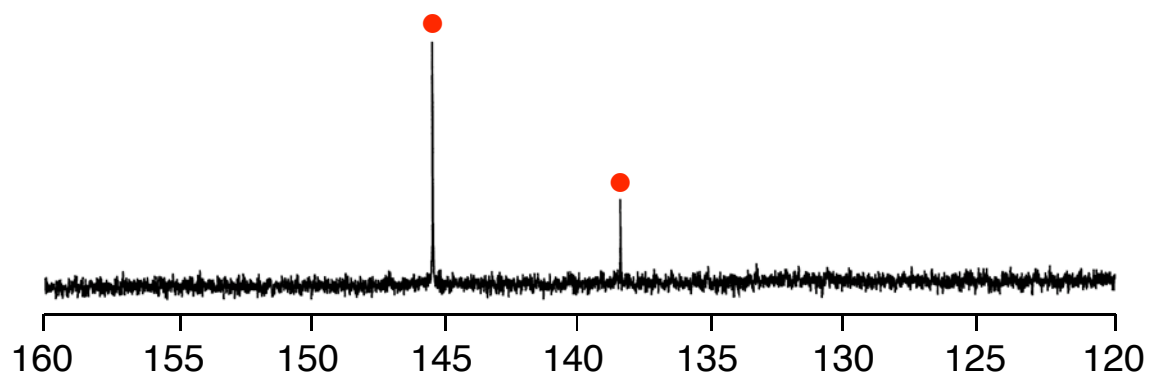

**Figure S10.**  $^{13}\text{C}$  NMR spectrum (150 MHz) of  $\text{La}_2@C_{80}$  in  $\text{CS}_2$  (acetone- $d_6$  in capillary as lock solvent) at 298 K.

**Table S1.** Redox Potentials<sup>a</sup> of **3a**, **3b** and La<sub>2</sub>@C<sub>80</sub>

| Compound                         | $E_{\text{ox}}$    | $E_{\text{red}}$   |
|----------------------------------|--------------------|--------------------|
| <b>3a</b>                        | -0.06 <sup>b</sup> | -0.76              |
| <b>3b</b>                        | -0.03 <sup>b</sup> | -0.70              |
| La <sub>2</sub> @C <sub>80</sub> | 0.56 <sup>c</sup>  | -0.31 <sup>c</sup> |

<sup>a</sup>Values are obtained by differential pulse voltammetry in Volts relative to ferrocene/ferrocenium couple. Conditions: 0.1 M (*n*-Bu)<sub>4</sub>NPF<sub>6</sub> in 1,2-dichlorobenzene; working electrode, Pt disk; counter electrode, Pt wire; reference electrode, SCE.

<sup>b</sup>Irreversible. <sup>c</sup>T. Suzuki, Y. Maruyama, T. Kato, K. Kikuchi, Y. Nakao, Y. Achiba, K. Kobayashi and S. Nagase, *Angew. Chem., Int. Ed. Engl.*, 1995, **34**, 1094.
